1 BIOLOGICAL SCIENCES: Biophysics and Computational Biology

2

3 ***Measuring and modeling diffuse scattering in***  
4 ***protein X-ray crystallography***

5

6 short title: Diffuse scattering in protein X-ray crystallography

7

8 Andrew H. Van Benschoten<sup>1</sup>, Lin Liu<sup>1</sup>, Ana Gonzalez<sup>2</sup>, Aaron S. Brewster<sup>3</sup>, Nicholas K. Sauter<sup>3</sup>,  
9 James S. Fraser<sup>1,\*</sup>, Michael E. Wall<sup>4,\*</sup>

10 1 - Dept. of Bioengineering and Therapeutic Sciences, University of California, San Francisco, San  
11 Francisco, CA 11 94158

12 2 - Stanford Synchrotron Radiation Lightsource, SLAC National Accelerator Laboratory, Menlo Park, CA  
13 94025

14 3 - Molecular Biophysics & Integrated Bioimaging Division, Lawrence Berkeley National Laboratory,  
15 Berkeley, CA 94720

16 4 - Computer, Computational, and Statistical Sciences Division, Los Alamos National Laboratory, Los  
17 Alamos, NM, 87545

18

19 \*correspondence: [jfraser@fraserlab.com](mailto:jfraser@fraserlab.com), [mewall@lanl.gov](mailto:mewall@lanl.gov)

20

21 Keywords: protein dynamics, normal modes, structural biology, diffuse scattering

22

23 Los Alamos National Laboratory technical release number: LA-UR-15-28934

24

25

26

## 27 **Abstract**

28 X-ray diffraction has the potential to provide rich information about the structural dynamics of  
29 macromolecules. To realize this potential, both Bragg scattering, which is currently used to  
30 derive macromolecular structures, and diffuse scattering, which reports on correlations in  
31 charge density variations must be measured. Until now measurement of diffuse scattering from  
32 protein crystals has been scarce, due to the extra effort of collecting diffuse data. Here, we  
33 present three-dimensional measurements of diffuse intensity collected from crystals of the  
34 enzymes cyclophilin A and trypsin. The measurements were obtained from the same X-ray  
35 diffraction images as the Bragg data, using best practices for standard data collection. To model  
36 the underlying dynamics in a practical way that could be used during structure refinement, we  
37 tested Translation-Libration-Screw (TLS), Liquid-Like Motions (LLM), and coarse-grained  
38 Normal Modes (NM) models of protein motions. The LLM model provides a global picture of  
39 motions and were refined against the diffuse data, while the TLS and NM models provide more  
40 detailed and distinct descriptions of atom displacements, and only used information from the  
41 Bragg data. Whereas different TLS groupings yielded similar Bragg intensities, they yielded  
42 different diffuse intensities, none of which agreed well with the data. In contrast, both the LLM  
43 and NM models agreed substantially with the diffuse data. These results demonstrate a realistic  
44 path to increase the number of diffuse datasets available to the wider biosciences community  
45 and indicate that NM-based refinement can generate dynamics-inspired structural models that  
46 simultaneously agree with both Bragg and diffuse scattering.

47

## 48 **Significance**

49 The structural details of protein motions are critical to understanding many biological processes,  
50 but they are often hidden to conventional biophysical techniques. Diffuse X-ray scattering can  
51 reveal details of the correlated movements between atoms; however, the data collection  
52 historically has required extra effort and dedicated experimental protocols. We have measured  
53 three-dimensional diffuse intensities in X-ray diffraction from CypA and trypsin crystals using  
54 standard crystallographic data collection techniques. Analysis of the resulting data is consistent  
55 with the protein motions resembling diffusion in a liquid or vibrations of a soft solid. Our results  
56 show that using diffuse scattering to model protein motions can become a component of routine  
57 crystallographic analysis through the extension of commonplace methods.

58

59 \body

## 60 **Introduction:**

61 X-ray crystallography can be a key tool for elucidating the structural basis of protein motions  
62 that play critical roles in enzymatic reactions, protein-protein interactions and signaling  
63 cascades (van den Bedem and Fraser, 2015). X-ray diffraction yields an ensemble-averaged  
64 picture of the protein structure: each photon simultaneously probes multiple unit cells that can  
65 vary due to internal rearrangements or changes to the crystal lattice. Bragg analysis of X-ray  
66 diffraction only yields the mean charge density of the unit cell, however, which fundamentally  
67 limits the information that can be obtained about protein dynamics (Clarage and Phillips, 1997;  
68 Keen and Goodwin, 2015).

69  
70 A key limitation inherent in Bragg analysis is that alternative models with different correlations  
71 between atomic motions can yield the same mean charge density (Kuzmanic et al., 2011). The  
72 traditional approach to modeling atom movement is to assume a single structural model with  
73 individual atomic displacement parameters (B factors). Given sufficient data, anisotropic  
74 displacement factors can be modeled, yielding directional insights into motions that might cause  
75 variations in the crystal. When the data are more limited, Translation-Libration-Screw (TLS)  
76 structural refinement, in which motions are described using rigid body segments of the molecule  
77 (Schomaker and Trueblood, 1968), has emerged as a common tool to model protein domain  
78 movements in crystallography and has been used by 22% of PDB depositions (Painter and  
79 Merritt, 2005, 2006). However, TLS refinements that vary in the rigid body definitions can predict  
80 very different motions while maintaining equivalent agreement to Bragg X-ray diffraction data  
81 (Urzhumtsev et al., 2015; Van Benschoten et al., 2015).

82  
83 Additional sources of information have been used to overcome the inherent limitations of Bragg  
84 analysis in identifying collective protein motion. Patterns of steric clashes between alternative  
85 local conformations (van den Bedem et al., 2013) or time-averaged ensemble refinement  
86 (Burnley et al., 2012) can be used to suggest certain modes of concerted motion. However, the  
87 atomistic details of these correlated motions may only be reliably (yet indirectly) identified at  
88 high resolution, and time-averaged ensemble refinement is additionally complicated by the use  
89 of an underlying TLS model to account for crystal packing variations (Burnley et al., 2012).  
90 Alternative methods such as solid-state NMR experiments (Ma et al., 2015) or long time scale  
91 molecular dynamics simulations (Janowski et al., 2013; Janowski et al., 2015; Wall et al.,  
92 2014b) can be used to probe the structural basis of crystal packing variations and internal  
93 protein motions.

94  
95 Complementary information about internal protein motions also can be obtained in the X-ray  
96 crystallography experiment itself by analysis of diffuse scattering. Diffuse scattering arises when  
97 deviations away from a perfect crystal cause X-rays to be diffracted away from Bragg  
98 reflections. When the deviations are due to crystal vibrations, they can be described using  
99 textbook temperature diffuse scattering theory (see, e.g. (James, 1948)). When each unit cell  
100 varies independently, the diffuse intensity is proportional to the variance in the unit cell structure  
101 factor (Guinier, 1963) which is equivalent to the Fourier transform of the Patterson function of  
102 the charge density variations. The approximation of independent unit cells can break down  
103 when correlations extend across unit cell boundaries; however, motions with long correlation

104 lengths result in diffuse intensity concentrated in the immediate neighborhood of Bragg peaks.  
105 When analyzing the more broadly distributed diffuse intensity that corresponds to small  
106 correlation lengths (Caspar et al., 1988; Clarage et al., 1992; Wall et al., 1997a; Wall et al.,  
107 1997b) the contribution of inter-unit cell atom pairs is a small fraction of the total signal, which is  
108 therefore dominated by internal protein motions.

109  
110 Several approaches have been used to connect macromolecular diffuse scattering data to  
111 models of protein motion and lattice disorder. Notably, Peter Moore has emphasized the need to  
112 validate TLS models using diffuse scattering (Moore, 2009), as has been performed in a limited  
113 number of cases (Doucet and Benoit, 1987; Perez et al., 1996; Van Benschoten et al., 2015).  
114 Good agreement with the data has previously been observed for liquid-like motions (LLM)  
115 models (Caspar et al., 1988; Clarage et al., 1992; Wall et al., 1997a; Wall et al., 1997b). In the  
116 LLM model, the atoms in the protein are assumed to move randomly, like in a homogeneous  
117 medium; the motions were termed “liquid-like” by Caspar et al (Caspar et al., 1988) because the  
118 correlations in the displacements were assumed to fall off exponentially with the distance  
119 between atoms.

120  
121 Like the LLM model, normal modes (NM) models treat the protein as a softer substance than  
122 the TLS model while still treating it as a solid. Unlike the LLM model, however, normal-mode  
123 analysis (NMA) provides a much more detailed picture of the conformational ensemble,  
124 enabling a more direct connection to putative mechanisms of protein function (Yang et al.,  
125 2007). In addition, like TLS refinement, the normal modes refinement methods that have been  
126 developed for Bragg analysis use few additional parameters (Gniewek et al., 2012; Kidera et al.,  
127 1994; Lu and Ma, 2008; Ni et al., 2009; Poon et al., 2007). Unfortunately these programs are  
128 not currently available in the standard builds of the major refinement software. Reasonable  
129 qualitative agreement previously been seen using normal modes to model diffuse intensity in  
130 individual diffraction images (Faure et al., 1994; Mizuguchi et al., 1994), and, more recently, the  
131 fit of alternative coarse-grained elastic network models to diffuse scattering data of  
132 staphylococcal nuclease has been investigated (Riccardi et al., 2010).

133  
134 There is also a longstanding interest both in using diffuse scattering to validate improvements in  
135 MD simulations and in using MD to derive a structural basis for the protein motions that give rise  
136 to diffuse scattering (Clarage et al., 1995; Faure et al., 1994; Héry et al., 1998; Meinhold et al.,  
137 2007; Meinhold and Smith, 2005a, 2005b, 2007; Wall et al., 2014b). Recent advances in  
138 computing now enable microsecond duration simulations (Wall et al., 2014b) that can overcome  
139 past barriers to accurate calculations seen using 10 ns or shorter MD trajectories (Clarage et al.,  
140 1995; Meinhold and Smith, 2005a).

141  
142 Despite the fact that diffuse scattering analysis is relatively well developed in small-molecule  
143 crystallography (Welberry, 2004) and materials science (Keen and Goodwin, 2015), it has been  
144 underutilized in protein crystallography. There are relatively few examples of diffuse data  
145 analyzed using individual diffraction images from protein crystallography experiments, including  
146 studies of tropomyosin (Chacko and Phillips, 1992; Phillips et al., 1980), 6-phosphogluconate  
147 dehydrogenase (Helliwell et al., 1986), yeast initiator tRNA (Kolatkhar et al., 1994), insulin

148 (Caspar et al., 1988), lysozyme (Clarage et al., 1992; Doucet and Benoit, 1987; Faure et al.,  
149 1994; Mizuguchi et al., 1994; Perez et al., 1996), myoglobin (Clarage et al., 1995), Gag protein  
150 (Welberry et al., 2011), and the 70s ribosome subunit (Polikanov and Moore, 2015). Moreover,  
151 there are an even smaller number of examples involving complete three-dimensional diffuse  
152 data sets; these include studies of staphylococcal nuclease (Wall et al., 1997b), and calmodulin  
153 (Wall et al., 1997a).

154  
155 To exploit the increased information that is potentially available from diffuse scattering, there is  
156 a pressing need to increase the number of proteins for which complete three-dimensional  
157 diffuse datasets have been experimentally measured. Conventional data collection procedures  
158 use oscillation exposures to estimate the full Bragg intensities. In contrast, the complete three-  
159 dimensional datasets measured by Wall *et al.* (Wall et al., 1997a; Wall et al., 1997b) used  
160 specialized methods for integrating three-dimensional diffuse data from still diffraction images.  
161 Similar methods now can be generalized and applied to other systems using modern beamlines  
162 and X-ray detectors. In particular, the recent commercial development of pixel-array detectors  
163 (PADs), which possess tight point-spread functions and single-photon sensitivity (Gruner, 2012),  
164 have created new opportunities for measuring diffuse scattering as a routine tool in protein  
165 crystallography experiments using more conventional data collection protocols.

166  
167 Here, we present diffuse scattering datasets for the human proline isomerase cyclophilin A  
168 (CypA) and the bovine serine protease trypsin. These datasets substantially increase the  
169 amount of experimental three-dimensional diffuse scattering data available to the  
170 macromolecular crystallography community, providing a necessary foundation for further  
171 advancement of the field (Wall et al., 2014a). To assess the potential for routine collection of  
172 diffuse datasets in crystallography, rather than expending a great deal of effort in optimizing the  
173 diffuse data and collecting still images (Wall et al., 1997a; Wall et al., 1997b), we used  
174 oscillation images obtained using best practices for high-quality Bragg data collection. The  
175 resulting datasets are of sufficient quality that the diffuse scattering can discriminate among  
176 alternative TLS refinements (Van Benschoten et al., 2015), Liquid-Like Motion (LLM) models  
177 (Caspar et al., 1988; Clarage et al., 1992), and Normal Modes (NM) models ((Meinhold and  
178 Smith, 2007; Mizuguchi et al., 1994; Riccardi et al., 2010)). Moreover, the agreement of the NM  
179 models with both Bragg and diffuse scattering data suggests a path forward for anisotropic  
180 refinement of atomic displacements, while maintaining a small set of parameters, using both  
181 data sources simultaneously. Our results demonstrate that diffuse intensity can, and should, be  
182 measured in a typical X-ray crystallography experiment and indicate that diffuse X-ray scattering  
183 can be applied broadly as a tool to understand the conformational dynamics of macromolecules.

184  
185

186 **Results:**

187

188 **Experimental diffuse data show crystallographic symmetry**

189

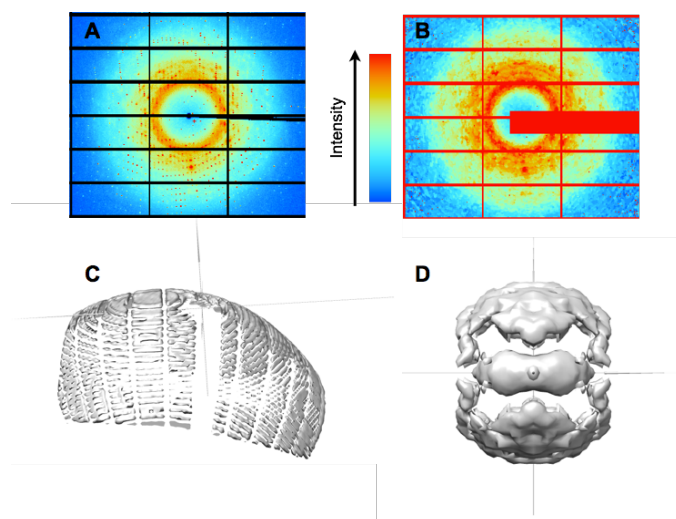

190

191 **Figure 1.** Steps in diffuse data integration. (A) Raw CypA diffraction images are processed (B) to remove  
192 Bragg peaks and enable direct comparisons of pixel values to models. (C) Pixels in diffraction images are  
193 mapped to reciprocal space and values of diffuse intensity are accumulated on a three-dimensional  
194 lattice; each diffraction image produces measurements of diffuse intensity on the surface of an Ewald  
195 sphere. (D) The data from individual images is combined and symmetrized to yield a nearly complete  
196 dataset (isosurface at a value of 65 photon counts in the total intensity, before subtracting the isotropic  
197 component).

198

199 The symmetrized anisotropic diffuse datasets processed by LUNUS (**Figure 1**) are shown in  
200 **Figure 2A** (CypA) and **Figure 2D** (trypsin) and are available as supplementary material. The  
201 CypA dataset is 98% complete to a resolution of 1.4 Å, while the trypsin map is 95% complete  
202 to 1.25 Å resolution. We used the Friedel symmetry and Laue group symmetry to quantify the  
203 level of crystallographic symmetry in each anisotropic map. To evaluate the degree Friedel  
204 symmetry, we averaged intensities between Friedel pairs to create a symmetrized map  $I_{Friedel}$   
205 and calculated the Pearson Correlation Coefficient (PCC) between the symmetrized and  
206 unsymmetrized data to obtain the statistic  $CC_{Friedel}$ . For CypA and trypsin,  $CC_{Friedel} = 0.90$  and  
207  $0.95$  respectively, demonstrating that diffuse intensities obey Friedel symmetry. To assess the  
208 degree of Laue group symmetry, we averaged P222-related reflections (the Laue symmetry  
209 corresponding to the P 21 21 21 space group of both CypA and trypsin crystals) to produce the  
210 symmetrized intensities,  $I_{P222}$ . The linear correlation  $CC_{Sym}$  was then computed between the  
211 symmetrized and unsymmetrized intensities. The correlations were substantial for both CypA  
212 ( $CC_{Sym} = 0.70$ ) and trypsin ( $CC_{Sym} = 0.69$ ). Thus, our data are consistent with the diffuse  
213 intensity following the Bragg peak symmetry. The trypsin data were integrated using one degree  
214 oscillation frames, while the CypA data were integrated using 0.5 degree oscillation frames. The  
215 comparable degree of symmetry in the CypA and trypsin data suggests that the measurement  
216 of diffuse intensity is robust with respect to this difference in data collection.

217



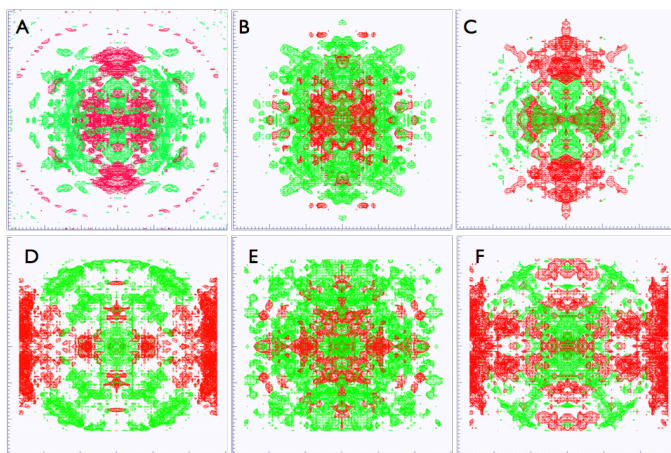

218  
219 **Figure 2.** Visualization of anisotropic diffuse intensities. (A) CypA experimental data with isosurfaces  
220 shown using wireframes at a level of 2 photon counts in the resolution range 4.16 Å – 2.97 Å. Positive  
221 intensity is rendered in green, negative in red. (B) Isosurfaces for diffuse scattering predicted by the  
222 CypA LLM model. (C) Residual diffuse scattering (experimental data (A) minus LLM (B)). (D) Trypsin  
223 experimental data with isosurfaces shown using wireframes at a level of 3 photon counts in the resolution  
224 range 4.53 Å – 3.26. (E) Isosurfaces for diffuse scattering predicted by the Trypsin LLM model. (F)  
225 Residual diffuse scattering (experimental data (D) minus LLM (E)).  
226

### 227 TLS models yield low correlation with diffuse scattering data

228  
229 To investigate how well TLS models agree with the molecular motions in the CypA crystal, we  
230 compared the experimental diffuse data to intensities calculated from three alternative TLS  
231 models: *phenix*, *tlsmd* and *whole molecule* (**Figure 3A-D**). Although all three models predict  
232 different motions, the R-factors are very similar: R,R-free = 16.4%,18.1% for the *whole*  
233 *molecule* and *Phenix* models; and 16.2%,18.1% for the TLSMD model. The correlations  
234 between the calculated diffuse intensity for these models and the anisotropic experimental data  
235 are low: 0.03 for the *phenix* model; 0.04 for the *TLSMD* model; and 0.14 for the *whole molecule*  
236 model. In addition, the pairwise correlations of the calculated diffuse intensities are low: 0.066  
237 for *whole molecule/TLSMD*; 0.116 for *whole molecule/Phenix*; and 0.220 for *Phenix/TLSMD*.  
238

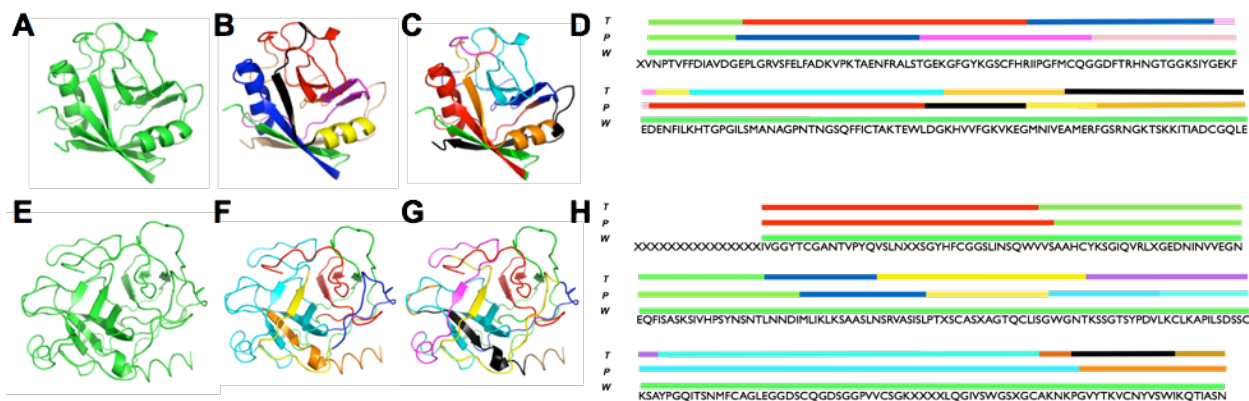

239  
240 **Figure 3.** Rigid body domain definitions used for TLS models. CypA and Trypsin TLS groups shown on  
241 the tertiary structure for whole molecule (A, E), Phenix (B, F), and TLSMD (C, G) and shown on the  
242 primary sequence (D, H).

243

244 Like CypA, the three trypsin TLS models (**Figure 3E-H**) yielded very similar R,R-free values:  
245 15.1%,16.7% for the *whole molecule* model; 15.3%,16.6% for the Phenix model; and  
246 15.2%,16.6% for the TLSMD model. Correlations between the calculated and experimental  
247 diffuse intensities are again low: 0.02 for the *Phenix* and *TLSMD* models, and 0.08 for the  
248 *Whole molecule* model. Comparisons of the calculated anisotropic diffuse intensity show that  
249 the *Whole molecule* motion is dissimilar to both the *Phenix* and *TLSMD* predictions (PCC = 0.03  
250 and 0.05, respectively). In contrast, the *Phenix* and *TLSMD* models yield much more similar  
251 diffuse intensities (PCC = 0.515). The relatively high correlation between these models is  
252 consistent with the similarity in the TLS groups (**Figure 3F-H**).

253

254 There are several possible explanations for the low correlation between the TLS model and  
255 diffuse data for CypA and trypsin. First, TLS domain groupings other than those identified here  
256 might yield higher agreement with the data. Second, the method used for generating ensembles  
257 (Van Benschoten, 2015) assumes that TLS domains vary independently; it is possible that  
258 accounting for correlations among the domains would more accurately describe the variations.  
259 Lastly, similar to the rigid body motions model of Doucet & Benoit (Doucet and Benoit, 1987),  
260 the correlations among TLS domains might lead to substantial correlations across unit cell  
261 boundaries, which would produce small scale diffuse features in the immediate neighborhood of  
262 Bragg peaks. The data integration methods used here cannot resolve these features, as the  
263 measurements are mapped to a Bragg lattice. Methods to integrate the small-scale features in  
264 protein crystallography onto a finer three-dimensional reciprocal space grid do exist (Wall et al.,  
265 1997a) and might be used to address this last possibility in the future. In any case, the low  
266 correlation of TLS models with the diffuse intensity for CypA and trypsin suggests that the  
267 variations in the protein crystal might not be best explained by motions of relatively large, rigid  
268 domains, and instead might involve motions that are correlated on a shorter length scale than  
269 accounted for by these models.

270

271

## 272 **Liquid-like motions models yield substantial correlation with diffuse scattering** 273 **data**

274

275 One model that accounts for short-range correlations is Liquid-Like Motions (LLM) (Caspar et  
276 al., 1988; Clarage et al., 1992). The LLM model assumes that atomic displacements are  
277 uncorrelated between different unit cells, but are correlated within the unit cells. The correlation  
278 in the displacements is assumed to decay exponentially as  $f(x) = e^{-x/\gamma}$ , where  $x$  is the  
279 separation of the atoms, and  $\gamma$  is the length scale of the correlation. The displacements of all  
280 atoms are assigned a standard deviation of  $\sigma$ . The LLM model previously has been refined  
281 against three-dimensional diffuse intensities obtained from crystalline staphylococcal nuclease  
282 (Wall et al., 1997b) and calmodulin (Wall et al., 1997a), yielding insights into correlated motions.

283

284 We refined isotropic LLM models of motions in CypA and trypsin against the experimental  
285 diffuse intensities (**Figure 2B, E and Methods**). The CypA model was refined using data in the  
286 resolution range 31.2 Å – 1.45 Å, and the trypsin model using 68 Å – 1.46 Å data. For CypA, the



287 refinement yielded  $\gamma = 7.1 \text{ \AA}$  and  $\sigma = 0.38 \text{ \AA}$  with a correlation of 0.518 between the calculated  
288 and experimental anisotropic intensities. The highest correlation between data and experiment  
289 occurs in the range  $3.67 \text{ \AA} - 3.28 \text{ \AA}$ , where the value is 0.74 (**Figure 4A**). For the trypsin  
290 dataset, the refinement yielded  $\gamma = 8.35 \text{ \AA}$  and  $\sigma = 0.32 \text{ \AA}$  with a correlation of 0.44, which is  
291 lower than for CypA. The peak value is 0.72 in the resolution range  $4.53 \text{ \AA} - 4.00 \text{ \AA}$  (**Figure 4B**).  
292

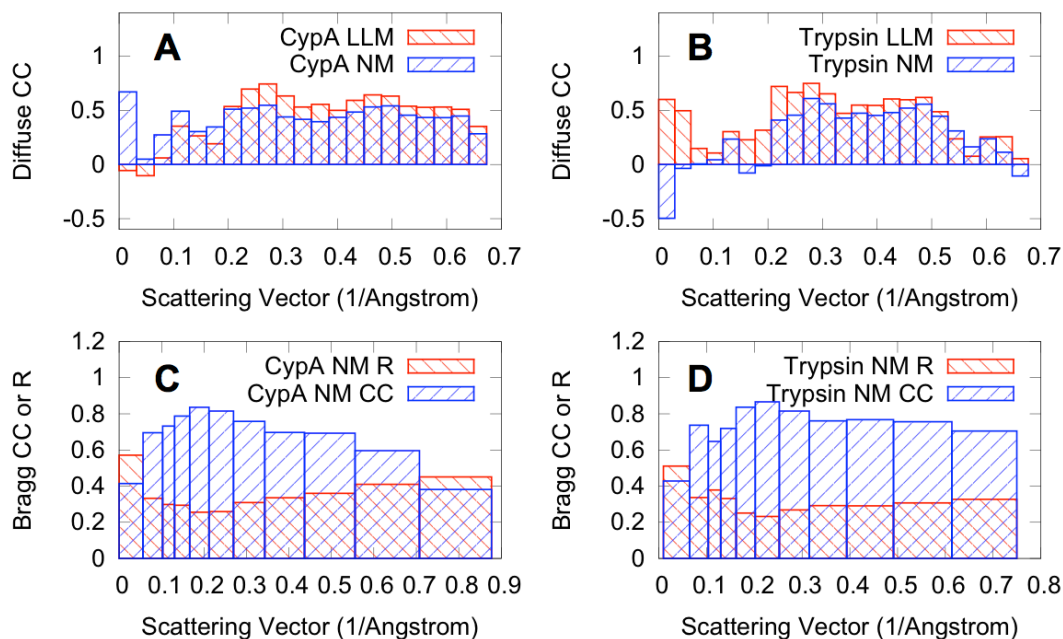

293 **Figure 4.** Agreement of models of protein motions with diffuse and Bragg data. (A, B) Linear correlation  
294 coefficients (CC) between diffuse data and LLM (red bars) or NM models (blue bars) computed by  
295 resolution shell for (A) CypA and (B) Trypsin. (C, D) Correlations and R-factors between Bragg data and  
296 NM models computed by resolution shell for (C) CypA and (D) Trypsin. Agreement factors for the diffuse  
297 and Bragg data were computed using LUNUS (Wall, 2009) and *Phenix* (Adams et al., 2010), respectively.  
298  
299  
300

301 The refined LLM models also were compared to the data using simulated diffraction images.  
302 Images corresponding to frame number 67 of the CypA data were obtained using the LLM  
303 model (Fig. 5A) and the integrated diffuse data (Fig. 5B). The main bright features above and  
304 below the origin are similar between the two. Many of the weaker features also appear to be  
305 similar, both at high and low resolution. The similarity is diminished but still apparent for images  
306 obtained for frame number 45 of trypsin (Supplementary Fig. S1). These simulations provide a  
307 visual confirmation of the substantial correlations obtained for the three-dimensional diffuse  
308 intensity.  
309

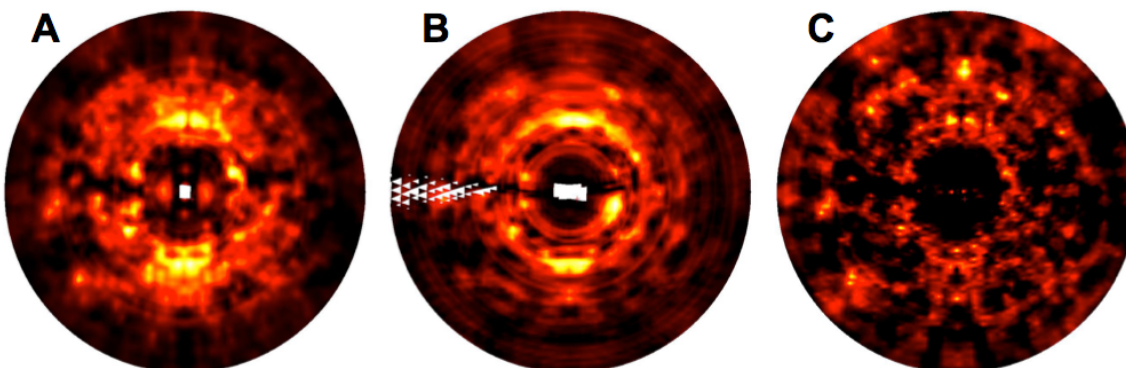

310  
311 **Figure 5.** Simulated diffraction images for CypA frame 67 obtained using: (A) liquid-like motions  
312 model; (B) integrated 3D diffuse data; (C) elastic network model. Lighter colors correspond to  
313 stronger intensity. White regions correspond to pixel values where there are missing values in  
314 the corresponding three-dimensional lattice (Methods).

315  
316 The substantial correlation of the LLM model with the diffuse data for CypA and trypsin indicates  
317 that the variations in the protein crystal can be approximately described using a model of the  
318 protein as a soft, homogeneous medium. The model implies that the motions of atoms  
319 separated by more than 7-8 Å are relatively independent, and that atoms that are closer to each  
320 other move in a more concerted way.

### 321 322 **Normal-modes can model both diffuse and Bragg scattering data**

323  
324 To assess the potential of NMA to be developed for diffuse scattering studies, we developed  
325 coarse-grained elastic network models of the CypA and trypsin unit cells (Methods). The  $C_{\alpha}$   
326 coordinates and B-factors for the NM models are by definition identical to those derived from the  
327 Bragg data (Methods). To assess the agreement of specific NM-derived conformational  
328 variations with the Bragg data, we generated 50 member ensembles from the Hessian  
329 (Methods). We applied a single isotropic B-factor across all atoms ensuring that all deviations in  
330 the individual magnitude and anisotropy originated from the normal modes (Fig. S2). The  
331 correlations were high across resolution shells (Fig. 4 C, D), yielding overall R-factors of 38%  
332 (CypA) and 31% (Trypsin) (Tables S1 and S2). We also calculated the predicted diffuse  
333 intensity from the NM models: the correlation of the CypA model with the data is 0.41 in the  
334 resolution range 31.2 Å – 1.45 Å, and the correlation of the trypsin model with the data is 0.38  
335 in the resolution range 68 Å – 1.46 Å. The agreement with the data is substantial within individual  
336 resolution shells (Fig. 4). The NM simulated diffraction image for CypA (Fig. 5C) shows bright  
337 features that are found in the data (Figs. 5B). The relative strength at high versus low-resolution  
338 is higher than in the data, however, suggesting that this NM model is too rigid; this discrepancy  
339 might be addressed by softening the intra-residue interactions and optimizing the model against  
340 the diffuse scattering data directly. The comparisons of simulated diffraction images for trypsin  
341 are consistent with the findings for CypA (Fig. S1).

342  
343 Overall the agreement of the NM models with the data assessed using either 3D diffuse  
344 scattering datasets (Fig. 4) or simulated diffraction images (Figs. 5, S1) is substantial but slightly

345 less than for the LLM models. However, it is important to interpret this comparison in light of the  
346 fact that the covariance matrices of the NM models were normalized to agree with the Bragg  
347 data and not parameterized against the diffuse data (Methods), while the LLM model is  
348 parameterized against the diffuse data. The agreement with the Bragg data is currently limited  
349 by the fact that the parameter optimization used only the refined  $C_{\alpha}$  positions and B-factors to  
350 agree with the Bragg data and that heteroatoms, such as solvent, were not included in the  
351 calculations. Collectively, these results point to the potential for normal modes to be refined  
352 jointly against Bragg and diffuse scattering data as an alternative atomic displacement model,  
353 replacing TLS or individual B-factors.

354

## 355 **Discussion:**

356

357 Diffuse X-ray scattering is a potentially valuable yet little exploited source of information about  
358 macromolecular dynamics. Diffuse intensities can double the total number of measured data  
359 points in the crystallographic experiment while providing a parallel dataset against which  
360 structural dynamical models can be refined or validated. Until now measurement of three-  
361 dimensional diffuse scattering data only has been pursued in dedicated efforts requiring extra  
362 still diffraction images and substantial optimization of experimental design. The present  
363 collection of two new datasets obtained using oscillation images using best current practices in  
364 room-temperature protein crystallography (Fraser et al., 2011), and the use of the data in  
365 evaluating TLS, LLM, and NM models, illustrates the potential for using diffuse scattering to  
366 increase understanding of protein structure variations in any X-ray crystallography experiment,  
367 representing a significant step towards moving diffuse scattering analysis into the mainstream of  
368 structural biology.

369

370 Diffuse data obtained for CypA and trypsin can distinguish among the TLS, LLM, and NM  
371 models of motions. However, the agreement with the data is somewhat lower than in previous  
372 LLM models of three-dimensional diffuse scattering (Wall et al., 1997a; Wall et al., 1997b). In  
373 this study, the correlation of the LLM model with the data was 0.518 in the range 31.2 Å – 1.45  
374 Å for CypA, and 0.44 in the range 68 Å – 1.46 Å for trypsin; in comparison, the correlation was  
375 0.595 in the range 10 Å – 2.5 Å for staphylococcal nuclease (Wall et al., 1997b) and 0.55 in the  
376 range 7.5 Å – 2.1 Å for calmodulin (Wall et al., 1997a). Some possible explanations for the  
377 lower agreement for CypA and trypsin include: the use of higher resolution data in the present  
378 studies; that LLM might be a better description of motions in staphylococcal nuclease and  
379 calmodulin than in CypA and trypsin; and that the measurements might have been more  
380 accurate in the past experiments, as the data collection was tailored for diffuse scattering. The  
381 apparent alignment of the residual intensity distribution with the unit cell axes (**Figures 2C, 2F**)  
382 also suggests that an anisotropic LLM model might be more appropriate than an isotropic LLM  
383 model for CypA and trypsin.

384

385 The agreement of the LLM models with three-dimensional experimental diffuse data across  
386 multiple systems warrants further consideration for using diffuse scattering in model refinement  
387 and validation. A key finding is that the agreement of the LLM models with the diffuse data is  
388 higher than the TLS models, which currently are used widely in protein crystallography.

389 Interestingly, the 7-8 Å length scale of the correlations is comparable to the size of the TLS  
390 domains; however, compared to the sharp domains of the TLS model, the exponential form of  
391 the correlations indicates that there is a smooth spatial transition between the correlated and  
392 uncorrelated atoms in the LLM. The smooth transition might be key to the increased agreement  
393 of the LLM with the diffuse data compared to the rigidly defined regions of the TLS model.

394

395 Our findings also support the use of NM models in combination with diffuse scattering for model  
396 refinement and validation. The exploratory work here, which did not use diffuse data for  
397 parameterization, indicates that NM models contain features that can capture aspects of the  
398 diffuse scattering data, and motivates further work to incorporate NM in both Bragg and diffuse  
399 refinement. In the coarse-grained NM model in Eq. (2), the residues are treated as rigid, which  
400 artificially increases anisotropic features at high resolution. We performed a limited exploration  
401 of models with decreased intra-residue atom correlations: so far these models have led to lower  
402 correlations with the data; however, in principle such models should be more accurate. Future  
403 work will focus on developing computationally efficient methods for optimizing the accuracy of  
404 the coarse-grained NM models and for using all-atom NM to model diffuse scattering.

405

406 Overall, the three-dimensional diffuse scattering data obtained here for CypA and trypsin, and  
407 previously for staphylococcal nuclease (Wall et al., 1997b) and calmodulin (Wall et al., 1997a)  
408 suggest that the protein structure varies more like a soft material than like a collection of  
409 independent rigid domains. An important consideration in developing these new refinement  
410 methods is to maintain a key advantage of TLS refinement at lower resolutions: the introduction  
411 of relatively few new parameters for refinement. This requirement also would be satisfied by  
412 NMA, which has a low computational cost and general applicability, making it a promising model  
413 for integrating diffuse scattering into crystallographic model building and refinement (Wall et al.,  
414 2014a). Whether this pursuit is well-motivated hinges on whether new biological insights can be  
415 gained from atomic displacements generated by NM models refined against Bragg and diffuse  
416 data. Indeed, although use of TLS in model refinement is now widespread, it scarcely has been  
417 used to generate biological hypotheses (for exceptions, see: (Chaudhry et al., 2004; Henzler-  
418 Wildman et al., 2007)). In contrast to TLS models, elastic network NM models have been widely  
419 used to draw functional inferences (Bahar et al., 2010). Both the encouraging agreement of the  
420 NM models with the diffuse scattering and the potential for NM models to yield new insights  
421 about the importance of conformational dynamics in protein function provide a strong motivation  
422 for further developing NM models for protein X-ray crystallography.

423

424 Diffuse scattering also can be used to validate models of molecular motions other than those  
425 considered here, including models produced by ensemble refinement (Burnley et al., 2012);  
426 multiconformer modeling performed by discrete (Keedy et al., 2015; van den Bedem et al.,  
427 2009) or continuous (Burling and Brünger, 1994; Kuriyan et al., 1991; Wall et al., 1997a)  
428 conformational sampling; and molecular dynamics simulations (Clarage and Phillips, 1994;  
429 Clarage et al., 1995; Faure et al., 1994; Héry et al., 1998; Janowski et al., 2013; Janowski et al.,  
430 2015; Meinhold et al., 2007; Meinhold and Smith, 2005a, 2005b; Wall et al., 2014b). In  
431 particular, molecular dynamics simulations now provide sufficient sampling to yield robust  
432 calculations of diffuse intensity (Wall et al., 2014b), and these can be used to consider a myriad

433 of intramolecular motions (e.g., loop openings and side chain flips) (Wilson, 2013) and lattice  
434 dynamics. Polikanov and Moore (Polikanov and Moore, 2015) recently have demonstrated the  
435 importance of lattice vibrations in explaining experimental diffuse scattering measurements of  
436 ribosome crystals, which indicates that models should simultaneously account for correlations  
437 that are coupled both within and across unit cell boundaries (Clarage et al., 1992; Wall et al.,  
438 1997a); accounting for lattice vibrations more accurately also might yield improved Bragg  
439 integration (Wall et al., 2014a). Moreover, comparisons of crystal simulations and diffuse  
440 scattering can provide a new observable for benchmarking improvements in energy functions  
441 and sampling schemes (Janowski et al., 2015).

442  
443 Although the initial successes of dynamics-based models of diffuse scattering indicates that  
444 crystal defects can play a secondary role in contributing to the diffuse signal, at least in some  
445 cases, consideration of crystal defects might become important to achieve the highest model  
446 accuracy and most general applicability of diffuse scattering in crystallography. Additionally, as  
447 more X-ray data from both brighter conventional and XFEL light sources, accounting for all  
448 sources of Bragg and diffuse scattering will be necessary to model the total scattering needed  
449 for innovative phasing applications (Gaffney and Chapman, 2007). In summary, the new  
450 datasets presented here demonstrate that diffuse scattering can now be routinely collected and  
451 that using these data will help us obtain an increasingly realistic picture of motion in protein  
452 crystals, including integrated descriptions of intramolecular motions, lattice vibrations, and  
453 crystal defects.

454

## 455 **Methods:**

456

### 457 **Protein purification and crystallization**

458

459 Trypsin crystals were obtained according to the method of Liebschner *et al.* (Liebschner et al.,  
460 2013). Lyophilized bovine pancreas trypsin was purchased from Sigma-Aldrich (T1005) and  
461 dissolved at a concentration of 30 mg/mL into 30mM HEPES pH 7.0, 5 mg/mL benzamidine and  
462 3mM CaCl<sub>2</sub>. Crystals were obtained from a solution of 200mM Ammonium sulfate, 100mM Na  
463 cacodylate pH 6.5, 20% PEG 8000 and 15% glycerol. CypA was purified and crystallized as  
464 previously described (Fraser et al., 2009). Briefly, the protein was concentrated to 60 mg/mL in  
465 20mM HEPES pH 7.5, 100mM NaCl and 500mM TCEP. Trays were set with a precipitant  
466 solution of 100mM HEPES pH 7.5, 22% PEG 3350 and 5mM TCEP. Both crystal forms were  
467 obtained using the hanging-drop method.

468

### 469 **Crystallographic data collection**

470

471 Diffraction data were collected on beamline 11-1 at the Stanford Synchrotron Radiation  
472 Lightsource (Menlo Park, CA). X-ray diffraction images were obtained using a Dectris PILATUS  
473 6M Pixel Array Detector (PAD). Each dataset was collected from a single crystal at an ambient  
474 temperature of 273K. To prevent dehydration, crystals were coated in a thin film of paratone  
475 with minimal surrounding mother liquor. For CypA, a single set of 0.5 degree oscillation images  
476 were collected and used for both Bragg and diffuse data processing. A total of 360 images were



477 collected across a 180 degree phi rotation. The Trypsin diffraction data consisted of one degree  
478 oscillations across a 135 degree phi rotation; this dataset was similarly used for both Bragg and  
479 diffuse data analysis. Both datasets were collected to optimize the Bragg signal, not the diffuse  
480 signal. Although not used here, we note that data collection using a PAD with fine phi slicing  
481 should be especially well suited for simultaneous collection of Bragg and diffuse data, as it  
482 would enable integration of diffuse intensity at a tunable level of detail in reciprocal space.

483

#### 484 **Bragg data processing**

485 Bragg diffraction data were processed using XDS and XSCALE (Kabsch, 2010) within the *xia2*  
486 software package (Winter et al., 2013). Molecular replacement solutions were found using  
487 Phaser (McCoy et al., 2007) within the *Phenix* software suite (Adams et al., 2010). The PDB  
488 search models were 4I8G for trypsin, and 2CPL for CypA. Initial structural refinement was  
489 performed using *phenix.refine* (Afonine et al., 2012). The strategy included refinement of  
490 individual atomic coordinates and water picking. Both the X-ray/atomic displacement  
491 parameters and X-ray/stereochemistry weights were optimized. Isotropic B-factors were chosen  
492 for the initial structures to allow for non-negligible R-factor optimization by subsequent TLS  
493 refinement strategies. All structures were refined for a total of 5 macrocycles. Statistics for these  
494 initial crystal structure models are shown in **Table 1**.

495

496 **Table 1.** Refinement statistics for CypA and trypsin models, before TLS modeling is applied.  
497

|                                  | <b>CypA</b>         | <b>Trypsin</b>      |
|----------------------------------|---------------------|---------------------|
| Resolution range, Å              | 38.66-1.4           | 23.29-1.25          |
| Space group                      | P 21 21 21          | P 21 21 21          |
| Unit cell, Å                     | 42.91, 52.44, 89.12 | 54.81, 58.51, 67.42 |
| Completeness (%)                 | 98                  | 95                  |
| R <sub>work</sub> (%)            | 17.88               | 15.9                |
| R <sub>free</sub> (%)            | 19.5                | 17.41               |
| RMS (bonds, Å)                   | 0.007               | 0.013               |
| RMS (angles, degrees)            | 1.16                | 1.61                |
| Ramachandran favored %           | 97                  | 98                  |
| Ramachandran allowed %           | 3                   | 2                   |
| Ramachandran outliers %          | 0                   | 0                   |
| Clashscore                       | 0.79                | 2.59                |
| Average B-factor, Å <sup>2</sup> | 21.42               | 14.57               |

498  
499 **Diffuse data integration**

500  
501 An overview of the diffuse data integration process is presented in **Figure 1**. Image processing  
502 was performed using the LUNUS collection of diffuse scattering tools (Wall, 2009). Pixels  
503 corresponding to the beam stop and image edges were masked using the *punchim* and *windim*  
504 methods. To focus on the diffuse intensity, which compared to Bragg peaks has low individual  
505 pixel values (while, being more broadly distributed in reciprocal space, having comparable total  
506 integrated intensity), pixel values outside of the range 1-10,000 photon counts were masked  
507 using *threshim*. The beam polarization was determined by analyzing the first frame to determine  
508 the azimuthal intensity profile within a 100 pixel wide annulus about the origin, and by fitting the  
509 resulting profile to the theoretical profile (Wall, 1996). Pixel values then were corrected for beam  
510 polarization using *polarim*. A solid-angle normalization (*normim*) correction was also applied.  
511 Mode filtering was used to remove Bragg peaks from diffraction images. This was accomplished  
512 using *modeim*, with a mask width of 20 pixels and a single bin for each photon count increment.  
513 These steps produced diffraction images in which pixel values could be directly compared to  
514 model diffuse intensities. This procedure, originally developed for experiments on

515 staphylococcal nuclease (Wall et al., 1997b), is similar to the steps used by Polikanov and  
516 Moore (Polikanov and Moore, 2015) to process individual ribosome diffraction images for  
517 analysis of diffuse scattering data.

518  
519 The Lunus processed frames were used to integrate the diffuse data onto a 3D lattice. The  
520 integration was performed using a python script that calls DIALS methods within the  
521 Computational Crystallography Toolbox (CCTBX; (Grosse-Kunstleve et al., 2002; Parkhurst et  
522 al., 2014)). The script obtains an indexing solution using the *real\_space\_grid\_search* method  
523 and uses the results to map each pixel in each diffraction image to fractional Miller indices  $h'k'l'$   
524 in reciprocal space. It sums the intensities from pixels in the neighborhood of each integer Miller  
525 index  $hkl$  and tracks the corresponding pixel counts, while ignoring pixels that fall within a  $\frac{1}{2} \times \frac{1}{2}$   
526  $\times \frac{1}{2}$  region about  $hkl$ . It writes the intensity sums and pixel counts for each frame on a grid,  
527 populated on an Ewald sphere that varies according to the crystal orientation for each image  
528 (**Figure 1C**). A radial scattering vector intensity profile was calculated for each frame using the  
529 Lunus *avgrlm* method and was used to scale diffuse frames across the entire dataset. The  
530 Lunus *sumlt* and *divlt* methods were used to compute the mean diffuse intensity at each grid  
531 point using the scaled sums and pixel counts from all of the frames.

532  
533 Because the model diffuse intensities were computed without considering solvent, experimental  
534 and model diffuse intensities were compared using just the anisotropic component of the signal,  
535 which is primarily due to the protein (Wall et al., 2014b). The Lunus *avgrlt* and *subrflt* routines  
536 were applied to subtract the radial average and obtain the anisotropic signal. Signal intensities  
537 were then symmetrized using *phenix.reflection\_file\_converter* to obtain a dataset for comparison  
538 to models. Datasets were compared to each other and to models using linear correlations  
539 computed using the *phenix.reflection\_statistics* tool.

540  
541 All images are available on SBCGrid Data Grid (<https://data.sbgrid.org/dataset/68/> for CypA;  
542 <https://data.sbgrid.org/dataset/201/> for Trypsin) and the integrated diffuse scattering maps are  
543 available as Supplementary Material.

## 544 **Simulated diffraction images**

545  
546  
547 Diffuse scattering images were simulated using methods similar to those for data integration in  
548 the previous section. After finding an indexing solution, a frame corresponding to the desired  
549 simulated image was selected from the data set. This frame was used as a template for  
550 obtaining a mapping of each pixel to fractional Miller indices. The new value of each pixel was  
551 obtained by linear interpolation of the values of diffuse intensity between the nearest-neighbor  
552 integer points  $hkl$  for which diffuse intensity was either measured (as in the previous section) or  
553 calculated (as in below sections on liquid-like motions and normal modes models). In the case  
554 of the synthetic images computed from the diffuse data, the images greatly enhanced the ability  
555 to visualize diffuse features compared to the original diffraction images (Supplementary Figs.  
556 S3, S4); the enhancement is due to the improved statistics obtained by averaging many pixel  
557 values to obtain a measurement at each value of  $hkl$ . The simulated images were processed to  
558 enhance visualization of diffuse features: the minimum pixel value was computed within each

559 pixel-width annulus about the beam center, and was subtracted from each pixel value within the  
560 annulus. Images were displayed using Adxv (Arvai, 2012), with display parameters selected for  
561 meaningful comparison of the diffuse features.

562

### 563 **TLS structure refinement and diffuse scattering model**

564

565 Three independent TLS refinements were performed for CypA (**Figure 3A-D**). The *Whole*  
566 *molecule* selection consists of the entire molecule as a single TLS group. The *Phenix* selection  
567 consists of the 8 groups (residues 2-14, 15-41, 42-64, 65-84, 85-122, 123-135, 136-145 and  
568 146-165) identified by *phenix.find\_tls\_groups*. The *TLSMD* selection consists of 8 groups  
569 (residues 2-15, 16-55, 56-80, 81-85, 86-91, 92-124, 125-143 and 144-165) identified by the TLS  
570 Motion Determination web server (Painter and Merritt, 2005, 2006). All TLS refinement was  
571 performed within *phenix.refine* through 5 macrocycles. Aside from the inclusion of TLS  
572 refinement, these macrocycles were identical to the initial structure refinement described above.

573

574 Similarly, for trypsin, we selected *Whole Molecule*, *Phenix*, and *TLSMD* TLS refinement  
575 strategies as described above (**Figure 3E-H**). The *Phenix* selection consists of 7 TLS groups:  
576 residues 16-54, 55-103, 104-123, 124-140, 141-155, 156-225 and 226-245. The *TLSMD*  
577 selection consists of 9 groups: residues 16-52, 53-98, 99-115, 116-144, 145-171, 172-220, 221-  
578 224, 225-237 and 238-245.

579

580 Structural ensembles of the CypA and trypsin TLS motions were generated through  
581 the *Phenix.tls\_as\_xyz* method (Urzhumtsev et al., 2015). Each ensemble consisted of 1,000  
582 random samples of the underlying TLS atomic displacement distributions, assuming  
583 independent distributions for each domain. Diffuse scattering models were calculated from the  
584 TLS ensembles using *Phenix.diffuse* (Van Benschoten et al., 2015). CypA and trypsin models  
585 were generated to a final resolution of 1.2 Å and 1.4 Å respectively, to match the resolution of  
586 the experimental data.

587

### 588 **Liquid-like motions model**

589

590 We computed Liquid-like motions (LLM) models of diffuse scattering using the structures refined  
591 prior to the TLS refinements (CypA: PDB ; Trypsin: PDB ). For both CypA and trypsin, the  
592 temperature factors for all atoms were set to zero and squared calculated structure factors  
593  $I_0(hkl)$  were computed using the *structure\_factors*, *as\_intensity\_array*, and *expand\_to\_p1*  
594 methods in CCTBX (Grosse-Kunstleve et al., 2002; Parkhurst et al., 2014). The Lunus *symflt*  
595 method was used to fill in missing values in reciprocal space using the appropriate P222 Laue  
596 symmetry.

597

598 Given a correlation length  $\gamma$  and amplitude of motion  $\sigma$ , the diffuse intensity predicted by the  
599 LLM model was calculated as

600

$$D_{LLM}(\mathbf{s}) = 4\pi^2 s^2 \sigma^2 e^{-4\pi^2 s^2 \sigma^2} I_0(\mathbf{s}) * \Gamma_\gamma(\mathbf{s}) \quad (1)$$

$$\Gamma_{\gamma}(\mathbf{s}) = \frac{8\pi\gamma^3}{(1 + 4\pi^2s^2\gamma^2)}$$

601  
602 Fourier methods in Lunus (*fftlt*) were used to compute the convolution. The agreement with the  
603 data was quantified by computing a linear correlation as a target function, using the anisotropic  
604 intensities (**Diffuse data integration**). Optimization of the target with respect to  $\gamma$  and  $\sigma$  was  
605 performed in a python script using *scipy.optimize* ([www.scipy.org](http://www.scipy.org)) with the Powell minimization  
606 method.

607

## 608 Normal modes model

609

610 The diffuse intensity was computed using a normal modes (NM) model of correlated atom  
611 displacements, using methods similar to Riccardi et al. (Riccardi et al., 2010). Atomic  
612 coordinates and isotropic displacement parameters were obtained from PDB entries 5F66  
613 (CypA) and 5F6M (trypsin) and were parsed and expanded to the P1 unit cell using the  
614 *iotbx.pdb* methods in CCTBX (Grosse-Kunstleve et al., 2002). The Hessian matrix  $\mathbf{H}$  was  
615 defined using a modified anisotropic elastic network model (Atilgan et al., 2001), with springs  
616 between  $C_{\alpha}$  atoms ( $i,j$ ) within a cutoff radius of 25 Å. The spring force constants were computed  
617 as  $ke^{-r_{ij}/\lambda}$ , where  $r_{ij}$  is the closest distance between atoms  $i$  and  $j$ , either in the same unit cell  
618 or in neighboring unit cells;  $\lambda = 10.5$  Å; and  $k = 1$  for  $r_{ij} < 25$  Å and  $k = 0$  otherwise (the  
619 nonzero value of  $k$  is arbitrary due to the normalization employed below). Covariances of atom  
620 pair displacements  $v_{ij} = \langle \mathbf{r}_i \cdot \mathbf{r}_j \rangle$  were obtained using the pseudoinverse of  $\mathbf{H}$  as described in  
621 (Atilgan et al., 2001). The values of  $v_{ij}$  were renormalized to  $\phi_{ij} = v_{ij}\sigma_i\sigma_j/(v_{ii}v_{jj})^{1/2}$  using the  
622 isotropic displacement parameters  $\sigma_i$  of the  $i^{\text{th}}$   $C_{\alpha}$  atom from the Bragg refinement; the model  
623 was thus consistent with the refined crystal structure.

624

625 The diffuse intensity was computed as

626

$$627 \quad D_{NM}(\mathbf{s}) = \sum_i \sum_j f_i f_j^* e^{-4\pi^2(\sigma_i^2 + \sigma_j^2)s^2} (e^{-4\pi^2s^2\phi_{ij}} - 1) \quad (2)$$

628

629 where  $f_i$  is the structure factor of the combined atoms in the residue associated with the  $i^{\text{th}}$   $C_{\alpha}$   
630 atom. Structure factors were computed using a two-gaussian approximation of atomic form  
631 factors; the parameters were obtained using the *elbx.xray\_scattering* methods in CCTBX  
632 (Grosse-Kunstleve et al., 2002); phase factors were applied using the atomic coordinates.

633

634 The Bragg intensities were computed from ensembles generated by using the first 10 nonzero  
635 eigenvectors of  $\mathbf{H}$  with corresponding inverse eigenvalues as their weights. Because the overall  
636 scale of the spring constant was arbitrary in the NM model (see above), the amplitudes of  
637 motion were too large using the absolute eigenvalues; they were therefore scaled to maintain  
638 the connectivity of the backbones. 50 member ensemble models were generated by Normal  
639 Mode Wizard (*NMWiz*) (Bakan et al., 2011), which is a *VMD* (Humphrey et al., 1996) plugin. A  
640 single B-factor of 10 was applied to all atoms in the ensemble. Structure factors were  
641 generated using *phenix.fmodel* and compared to the experimental data using  
642 *phenix.reflection\_statistics* (Adams et al., 2010).



643  
644  
645  
646

## Acknowledgments

647 We thank Pavel Afonine for computational assistance in converting and comparing structure  
648 factors. We are grateful to the UC Office of the President, Multicampus Research Programs and  
649 Initiatives grant MR-15-338599 and the Program for Breakthrough Biomedical Research, which  
650 is partially funded by the Sandler Foundation. Use of the Stanford Synchrotron Radiation  
651 Lightsource, SLAC National Accelerator Laboratory, is supported by the U.S. Department of  
652 Energy, Office of Science, Office of Basic Energy Sciences under Contract No. DE-AC02-  
653 76SF00515. The SSRL Structural Molecular Biology Program is supported by the DOE Office of  
654 Biological and Environmental Research, and by the National Institutes of Health, National  
655 Institute of General Medical Sciences (including P41GM103393). N.K.S. was supported by NIH  
656 grant GM095887. J.S.F. was supported by a Searle Scholar Award from the Kinship  
657 Foundation, a Pew Scholar Award from the Pew Charitable Trusts, a Packard Fellowship from  
658 the David and Lucile Packard Foundation, NIH OD009180, NIH GM110580, and NSF STC-  
659 1231306. M.E.W. was supported by the US Department of Energy under Contract DE-AC52-  
660 06NA25396 through the Laboratory-Directed Research and Development Program at Los  
661 Alamos National Laboratory (LANL). The LANL technical release number is LA-UR-15-28934.

662  
663  
664

## References

- 665 Adams, P.D., Afonine, P.V., Bunkoczi, G., Chen, V.B., Davis, I.W., Echols, N., Headd, J.J.,  
666 Hung, L.W., Kapral, G.J., Grosse-Kunstleve, R.W., *et al.* (2010). PHENIX: a comprehensive  
667 Python-based system for macromolecular structure solution. *Acta Crystallogr D Biol Crystallogr*  
668 *66*, 213-221.
- 669 Afonine, P.V., Grosse-Kunstleve, R.W., Echols, N., Headd, J.J., Moriarty, N.W., Mustyakimov,  
670 M., Terwilliger, T.C., Urzhumtsev, A., Zwart, P.H., and Adams, P.D. (2012). Towards automated  
671 crystallographic structure refinement with phenix.refine. *Acta Crystallogr D Biol Crystallogr* *68*,  
672 352-367.
- 673 Arvai, A. (2012). ADXV - a program to display X-ray diffraction images.
- 674 Atilgan, A.R., Durell, S.R., Jernigan, R.L., Demirel, M.C., Keskin, O., and Bahar, I. (2001).  
675 Anisotropy of fluctuation dynamics of proteins with an elastic network model. *Biophys J* *80*, 505-  
676 515.
- 677 Bahar, I., Lezon, T.R., Yang, L.W., and Eyal, E. (2010). Global dynamics of proteins: bridging  
678 between structure and function. *Annu Rev Biophys* *39*, 23-42.
- 679 Bakan, A., Meireles, L.M., and Bahar, I. (2011). ProDy: protein dynamics inferred from theory  
680 and experiments. *Bioinformatics* *27*, 1575-1577.
- 681 Burling, F.T., and Brünger, A.T. (1994). Thermal motions and conformational disorder in protein  
682 crystal structures: comparison of multi-conformer and time-averaging models. *Israeli J Chem*  
683 *34*, 165-175.

- 684 Burnley, B.T., Afonine, P.V., Adams, P.D., and Gros, P. (2012). Modelling dynamics in protein  
685 crystal structures by ensemble refinement. *Elife* 1, e00311.
- 686 Caspar, D.L., Clarage, J., Salunke, D.M., and Clarage, M. (1988). Liquid-like movements in  
687 crystalline insulin. *Nature* 332, 659-662.
- 688 Chacko, S., and Phillips, G.N., Jr. (1992). Diffuse x-ray scattering from tropomyosin crystals.  
689 *Biophys J* 61, 1256-1266.
- 690 Chaudhry, C., Horwich, A.L., Brunger, A.T., and Adams, P.D. (2004). Exploring the structural  
691 dynamics of the E.coli chaperonin GroEL using translation-libration-screw crystallographic  
692 refinement of intermediate states. *J Mol Biol* 342, 229-245.
- 693 Clarage, J.B., Clarage, M.S., Phillips, W.C., Sweet, R.M., and Caspar, D.L. (1992). Correlations  
694 of atomic movements in lysozyme crystals. *Proteins* 12, 145-157.
- 695 Clarage, J.B., and Phillips, G.N., Jr. (1994). Cross-validation tests of time-averaged molecular  
696 dynamics refinements for determination of protein structures by X-ray crystallography. *Acta*  
697 *Crystallogr D Biol Crystallogr* 50, 24-36.
- 698 Clarage, J.B., and Phillips, G.N., Jr. (1997). Analysis of diffuse scattering and relation to  
699 molecular motion. *Methods Enzymol* 277, 407-432.
- 700 Clarage, J.B., Romo, T., Andrews, B.K., Pettitt, B.M., and Phillips, G.N., Jr. (1995). A sampling  
701 problem in molecular dynamics simulations of macromolecules. *Proc Natl Acad Sci U S A* 92,  
702 3288-3292.
- 703 Doucet, J., and Benoit, J.P. (1987). Molecular dynamics studied by analysis of the X-ray diffuse  
704 scattering from lysozyme crystals. *Nature* 325, 643-646.
- 705 Faure, P., Micu, A., Perahia, D., Doucet, J., Smith, J.C., and Benoit, J.P. (1994). Correlated  
706 intramolecular motions and diffuse X-ray scattering in lysozyme. *Nat Struct Biol* 1, 124-128.
- 707 Fraser, J.S., Clarkson, M.W., Degnan, S.C., Erion, R., Kern, D., and Alber, T. (2009). Hidden  
708 alternative structures of proline isomerase essential for catalysis. *Nature* 462, 669-673.
- 709 Fraser, J.S., van den Bedem, H., Samelson, A.J., Lang, P.T., Holton, J.M., Echols, N., and  
710 Alber, T. (2011). Accessing protein conformational ensembles using room-temperature X-ray  
711 crystallography. *Proc Natl Acad Sci U S A* 108, 16247-16252.
- 712 Gaffney, K.J., and Chapman, H.N. (2007). Imaging atomic structure and dynamics with ultrafast  
713 x-ray scattering. *Science* 316, 1444-1448.
- 714 Gniewek, P., Kolinski, A., Jernigan, R.L., and Kloczkowski, A. (2012). Elastic network normal  
715 modes provide a basis for protein structure refinement. *J Chem Phys* 136, 195101.
- 716 Grosse-Kunstleve, R.W., Sauter, N.K., Moriarty, N.W., and Adams, P.D. (2002). The  
717 Computational Crystallography Toolbox: crystallographic algorithms in a reusable software  
718 framework. *Journal of Applied Crystallography* 35, 126-136.
- 719 Gruner, S.M. (2012). X-ray imaging detectors. *Physics Today* 65, 29-34.

- 720 Guinier, A. (1963). X-ray diffraction in crystals, imperfect crystals, and amorphous bodies  
721 (Courier Dover Publications).
- 722 Helliwell, J., Glover, I., Jones, A., Pantos, E., and Moss, D. (1986). Protein dynamics: use of  
723 computer graphics and protein crystal diffuse scattering recorded with synchrotron X-radiation.  
724 *Biochemical Society Transactions* *14*, 653-655.
- 725 Henzler-Wildman, K.A., Thai, V., Lei, M., Ott, M., Wolf-Watz, M., Fenn, T., Pozharski, E.,  
726 Wilson, M.A., Petsko, G.A., Karplus, M., *et al.* (2007). Intrinsic motions along an enzymatic  
727 reaction trajectory. *Nature* *450*, 838-844.
- 728 Héry, S., Genest, D., and Smith, J.C. (1998). X-ray diffuse scattering and rigid-body motion in  
729 crystalline lysozyme probed by molecular dynamics simulation. *J Mol Biol* *279*, 303-319.
- 730 Humphrey, W., Dalke, A., and Schulten, K. (1996). VMD: visual molecular dynamics. *J Mol*  
731 *Graph* *14*, 33-38, 27-38.
- 732 James, R. (1948). *The Optical Principles of the Diffraction of X-Rays* (London: Bell).
- 733 Janowski, P.A., Cerutti, D.S., Holton, J., and Case, D.A. (2013). Peptide crystal simulations  
734 reveal hidden dynamics. *J Am Chem Soc* *135*, 7938-7948.
- 735 Janowski, P.A., Liu, C., Deckman, J., and Case, D.A. (2015). Molecular dynamics simulation of  
736 triclinic lysozyme in a crystal lattice. *Protein Sci.*
- 737 Kabsch, W. (2010). Xds. *Acta Crystallogr D Biol Crystallogr* *66*, 125-132.
- 738 Keedy, D.A., Fraser, J.S., and van den Bedem, H. (2015). Exposing Hidden Alternative  
739 Backbone Conformations in X-ray Crystallography Using qFit. *PLoS Comput Biol* *11*, e1004507.
- 740 Keen, D.A., and Goodwin, A.L. (2015). The crystallography of correlated disorder. *Nature* *521*,  
741 303-309.
- 742 Kidera, A., Matsushima, M., and Go, N. (1994). Dynamic structure of human lysozyme derived  
743 from X-ray crystallography: normal mode refinement. *Biophys Chem* *50*, 25-31.
- 744 Kolatkar, A.R., Clarage, J.B., and Phillips, G.N., Jr. (1994). Analysis of diffuse scattering from  
745 yeast initiator tRNA crystals. *Acta Crystallogr D Biol Crystallogr* *50*, 210-218.
- 746 Kuriyan, J., Osapay, K., Burley, S.K., Brunger, A.T., Hendrickson, W.A., and Karplus, M. (1991).  
747 Exploration of disorder in protein structures by X-ray restrained molecular dynamics. *Proteins*  
748 *10*, 340-358.
- 749 Kuzmanic, A., Kruschel, D., van Gunsteren, W.F., Pannu, N.S., and Zagrovic, B. (2011).  
750 Dynamics may significantly influence the estimation of interatomic distances in biomolecular X-  
751 ray structures. *J Mol Biol* *411*, 286-297.
- 752 Liebschner, D., Dauter, M., Brzuszkiewicz, A., and Dauter, Z. (2013). On the reproducibility of  
753 protein crystal structures: five atomic resolution structures of trypsin. *Acta Crystallogr D Biol*  
754 *Crystallogr* *69*, 1447-1462.

- 755 Lu, M., and Ma, J. (2008). A minimalist network model for coarse-grained normal mode analysis  
756 and its application to biomolecular x-ray crystallography. *Proc Natl Acad Sci U S A* *105*, 15358-  
757 15363.
- 758 Ma, P., Xue, Y., Coquelle, N., Haller, J.D., Yuwen, T., Ayala, I., Mikhailovskii, O., Willbold, D.,  
759 Colletier, J.P., Skrynnikov, N.R., *et al.* (2015). Observing the overall rocking motion of a protein  
760 in a crystal. *Nat Commun* *6*, 8361.
- 761 McCoy, A.J., Grosse-Kunstleve, R.W., Adams, P.D., Winn, M.D., Storoni, L.C., and Read, R.J.  
762 (2007). Phaser crystallographic software. *J Appl Crystallogr* *40*, 658-674.
- 763 Meinhold, L., Merzel, F., and Smith, J.C. (2007). Lattice dynamics of a protein crystal. *Phys Rev*  
764 *Lett* *99*, 138101.
- 765 Meinhold, L., and Smith, J.C. (2005a). Correlated dynamics determining x-ray diffuse scattering  
766 from a crystalline protein revealed by molecular dynamics simulation. *Phys Rev Lett* *95*,  
767 218103.
- 768 Meinhold, L., and Smith, J.C. (2005b). Fluctuations and correlations in crystalline protein  
769 dynamics: a simulation analysis of staphylococcal nuclease. *Biophys J* *88*, 2554-2563.
- 770 Meinhold, L., and Smith, J.C. (2007). Protein dynamics from X-ray crystallography: anisotropic,  
771 global motion in diffuse scattering patterns. *Proteins* *66*, 941-953.
- 772 Mizuguchi, K., Kidera, A., and Go, N. (1994). Collective motions in proteins investigated by X-  
773 ray diffuse scattering. *Proteins* *18*, 34-48.
- 774 Moore, P.B. (2009). On the relationship between diffraction patterns and motions in  
775 macromolecular crystals. *Structure* *17*, 1307-1315.
- 776 Ni, F., Poon, B.K., Wang, Q., and Ma, J. (2009). Application of normal-mode refinement to X-ray  
777 crystal structures at the lower resolution limit. *Acta Crystallogr D Biol Crystallogr* *65*, 633-643.
- 778 Painter, J., and Merritt, E.A. (2005). A molecular viewer for the analysis of TLS rigid-body  
779 motion in macromolecules. *Acta Crystallogr D Biol Crystallogr* *61*, 465-471.
- 780 Painter, J., and Merritt, E.A. (2006). Optimal description of a protein structure in terms of  
781 multiple groups undergoing TLS motion. *Acta Crystallogr D Biol Crystallogr* *62*, 439-450.
- 782 Parkhurst, J.M., Brewster, A.S., Fuentes-Montero, L., Waterman, D.G., Hattne, J., Ashton, A.W.,  
783 Echols, N., Evans, G., Sauter, N.K., and Winter, G. (2014). : the diffraction experiment toolbox.  
784 *J Appl Crystallogr* *47*, 1459-1465.
- 785 Perez, J., Faure, P., and Benoit, J.P. (1996). Molecular rigid-body displacements in a tetragonal  
786 lysozyme crystal confirmed by X-ray diffuse scattering. *Acta Crystallogr D Biol Crystallogr* *52*,  
787 722-729.
- 788 Phillips, G.N., Jr., Fillers, J.P., and Cohen, C. (1980). Motions of tropomyosin. Crystal as  
789 metaphor. *Biophys J* *32*, 485-502.

- 790 Polikanov, Y.S., and Moore, P.B. (2015). Acoustic vibrations contribute to the diffuse scatter  
791 produced by ribosome crystals. *Acta Crystallogr D Biol Crystallogr* *71*, 2021-2031.
- 792 Poon, B.K., Chen, X., Lu, M., Vyas, N.K., Quioco, F.A., Wang, Q., and Ma, J. (2007). Normal  
793 mode refinement of anisotropic thermal parameters for a supramolecular complex at 3.42-Å  
794 crystallographic resolution. *Proc Natl Acad Sci U S A* *104*, 7869-7874.
- 795 Riccardi, D., Cui, Q., and Phillips, G.N., Jr. (2010). Evaluating elastic network models of  
796 crystalline biological molecules with temperature factors, correlated motions, and diffuse x-ray  
797 scattering. *Biophys J* *99*, 2616-2625.
- 798 Schomaker, V., and Trueblood, K.N. (1968). On the rigid-body motion of molecules in crystals.  
799 *Acta Crystallographica Section B* *24*, 63-76.
- 800 Urzhumtsev, A., Afonine, P.V., Van Benschoten, A.H., Fraser, J.S., and Adams, P.D. (2015).  
801 From deep TLS validation to ensembles of atomic models built from elemental motions. *Acta*  
802 *Crystallogr D Biol Crystallogr* *71*, 1668-1683.
- 803 Van Benschoten, A.H., Afonine, P.V., Terwilliger, T.C., Wall, M.E., Jackson, C.J., Sauter, N.K.,  
804 Adams, P.D., Urzhumtsev, A., and Fraser, J.S. (2015). Predicting X-ray diffuse scattering from  
805 translation-libration-screw structural ensembles. *Acta Crystallogr D Biol Crystallogr* *71*, 1657-  
806 1667.
- 807 van den Bedem, H., Bhabha, G., Yang, K., Wright, P.E., and Fraser, J.S. (2013). Automated  
808 identification of functional dynamic contact networks from X-ray crystallography. *Nat Methods*  
809 *10*, 896-902.
- 810 van den Bedem, H., Dhanik, A., Latombe, J.C., and Deacon, A.M. (2009). Modeling discrete  
811 heterogeneity in X-ray diffraction data by fitting multi-conformers. *Acta Crystallogr D Biol*  
812 *Crystallogr* *65*, 1107-1117.
- 813 van den Bedem, H., and Fraser, J.S. (2015). Integrative, dynamic structural biology at atomic  
814 resolution--it's about time. *Nat Methods* *12*, 307-318.
- 815 Wall, M.E. (2009). Methods and software for diffuse X-ray scattering from protein crystals.  
816 *Methods Mol Biol* *544*, 269-279.
- 817 Wall, M.E., Adams, P.D., Fraser, J.S., and Sauter, N.K. (2014a). Diffuse X-ray scattering to  
818 model protein motions. *Structure* *22*, 182-184.
- 819 Wall, M.E., Clarage, J.B., and Phillips, G.N. (1997a). Motions of calmodulin characterized using  
820 both Bragg and diffuse X-ray scattering. *Structure* *5*, 1599-1612.
- 821 Wall, M.E., Ealick, S.E., and Gruner, S.M. (1997b). Three-dimensional diffuse x-ray scattering  
822 from crystals of Staphylococcal nuclease. *Proc Natl Acad Sci U S A* *94*, 6180-6184.
- 823 Wall, M.E., Van Benschoten, A.H., Sauter, N.K., Adams, P.D., Fraser, J.S., and Terwilliger, T.C.  
824 (2014b). Conformational dynamics of a crystalline protein from microsecond-scale molecular  
825 dynamics simulations and diffuse X-ray scattering. *Proc Natl Acad Sci U S A* *111*, 17887-17892.



- 826 Welberry, T.R. (2004). *Diffuse X-Ray Scattering and Models of Disorder* (Oxford: Oxford  
827 University Press).
- 828 Welberry, T.R., Heerdegen, A.P., Goldstone, D.C., and Taylor, I.A. (2011). Diffuse scattering  
829 resulting from macromolecular frustration. *Acta Crystallogr B* 67, 516-524.
- 830 Wilson, M.A. (2013). Visualizing networks of mobility in proteins. *Nat Methods* 10, 835-837.
- 831 Winter, G., Lobley, C.M., and Prince, S.M. (2013). Decision making in xia2. *Acta Crystallogr D*  
832 *Biol Crystallogr* 69, 1260-1273.
- 833 Yang, L., Song, G., and Jernigan, R.L. (2007). How well can we understand large-scale protein  
834 motions using normal modes of elastic network models? *Biophys J* 93, 920-929.  
835
